# Supplementary material
Source: publisher figshare collection journal article supplement (https://frontiersin.figshare.com/ndownloader/files/12505769)
Supplement: Supplementary file [file 12505769]

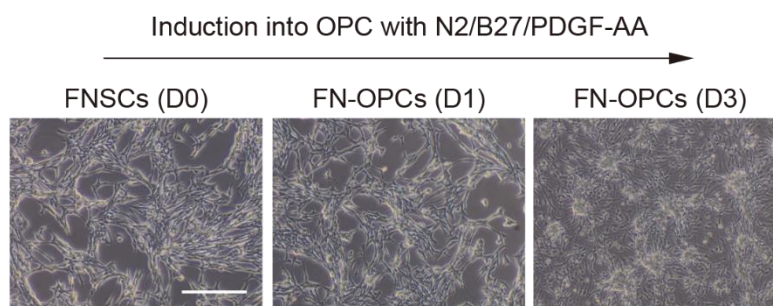

**Supplementary Figure 1.** Generation of FN-derived OPCs. Induction of forebrain neural stem cell-derived OPCs (FN-OPCs). Forebrain-NSCs have a capacity of differentiation into OPCs. Scale bar: 250  $\mu\text{m}$ .
